# Supplementary material for: Metabolic priming by multiple enzyme systems supports glycolysis, HIF1α stabilisation, and human cancer cell survival in early hypoxia
Source: PubMed Central journal article supplement (PMC11021510; doi:10.1038/s44318-024-00065-w), 2024-03-14
Supplement: 44318_2024_65_MOESM1_ESM.pdf [file 44318_2024_65_MOESM1_ESM.pdf]

# APPENDIX

Grimm *et al.*

## Table of contents

### Appendix Figures

|                                              |    |
|----------------------------------------------|----|
| Appendix Figure S1, related to Figure 1..... | 2  |
| Appendix Figure S2, related to Figure 2..... | 3  |
| Appendix Figure S3, related to Figure 3..... | 4  |
| Appendix Figure S4, related to Figure 4..... | 6  |
| Appendix Figure S5, related to Figure 5..... | 8  |
| Appendix Figure S6, related to Figure 6..... | 10 |

### Appendix Tables

|                                                                                            |    |
|--------------------------------------------------------------------------------------------|----|
| Appendix Table S1. Table of fragment ions used for metabolite quantification by GC-MS..... | 12 |
| Appendix Table S2. Table of fragment ions used for metabolite quantification by LC-MS..... | 13 |

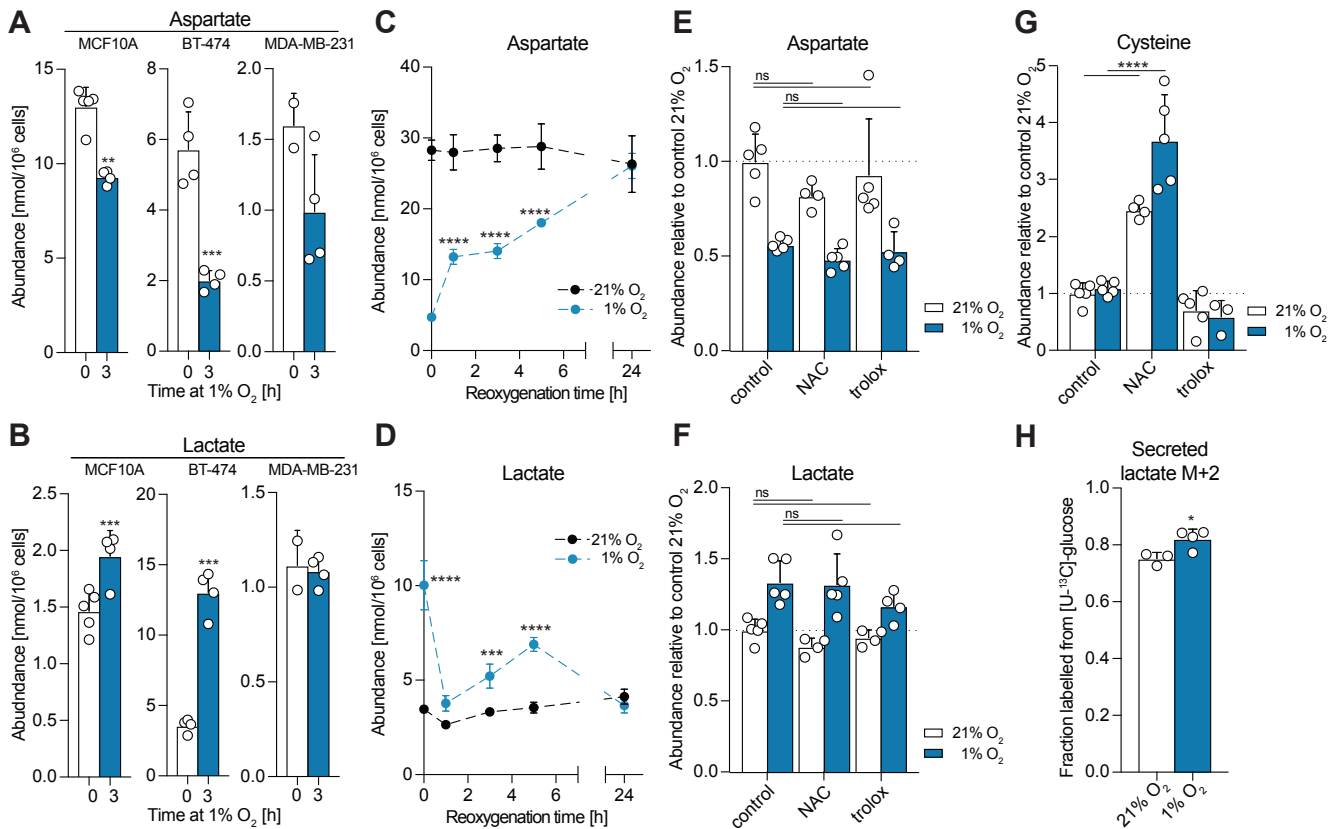

**Appendix Figure S1 related to Figure 1. Increase in lactate and decrease in aspartate levels induced by exposure to 1% O<sub>2</sub> occur in other cell lines, are reversible upon reoxygenation and cannot be prevented by antioxidant treatment.**

**A-B)** Intracellular abundances of lactate and aspartate in the indicated cell lines at 21% O<sub>2</sub> and after 3 h at 1% O<sub>2</sub>. See also **Figure 1C-D**.

**C-D)** Intracellular abundances of lactate and aspartate in MCF7 cells exposed to 1% O<sub>2</sub> for 3 h, followed by reoxygenation at 21% O<sub>2</sub> for the indicated lengths of time, compared to control cells in normoxia.

**E-G)** Intracellular abundances of lactate, aspartate and cysteine in MCF7 cells incubated in 21% O<sub>2</sub> or 1% O<sub>2</sub> for 3 h, with and without antioxidant treatment (NAC, N-acetylcysteine: 1mM; Trolox: 50 μM. Cysteine levels shown to confirm the effect of NAC on cells.

**H)** Fraction of lactate M+2 labelled from [U-<sup>13</sup>C]-glucose in cell culture media from MCF7 cells incubated in 21% O<sub>2</sub> or 1% O<sub>2</sub> for 5 h with the isotopic tracer. The quantified ion (m/z 117) contains two carbons that correspond to C2 and C3 of lactate.

Data information: Datapoints in all panels represent mean ± s.d. n = 5 (E, G), n = 3 (H) or n = 4 (A-D) cultures per cell line/time point/condition [except in A, B; MDA-MB-231 0 h (n = 2) and MCF10A 0 h (n = 5)]. P values for differences between 21% vs 1% O<sub>2</sub> were calculated by a two-tailed unpaired t-test (A, B, H), two-way ANOVA Sidak's test (C-D) or two-way ANOVA Dunnett's test (E, G). ns: non-significant, \* P<0.05, \*\* P<0.01, \*\*\* P<0.001, \*\*\*\* P<0.0001.

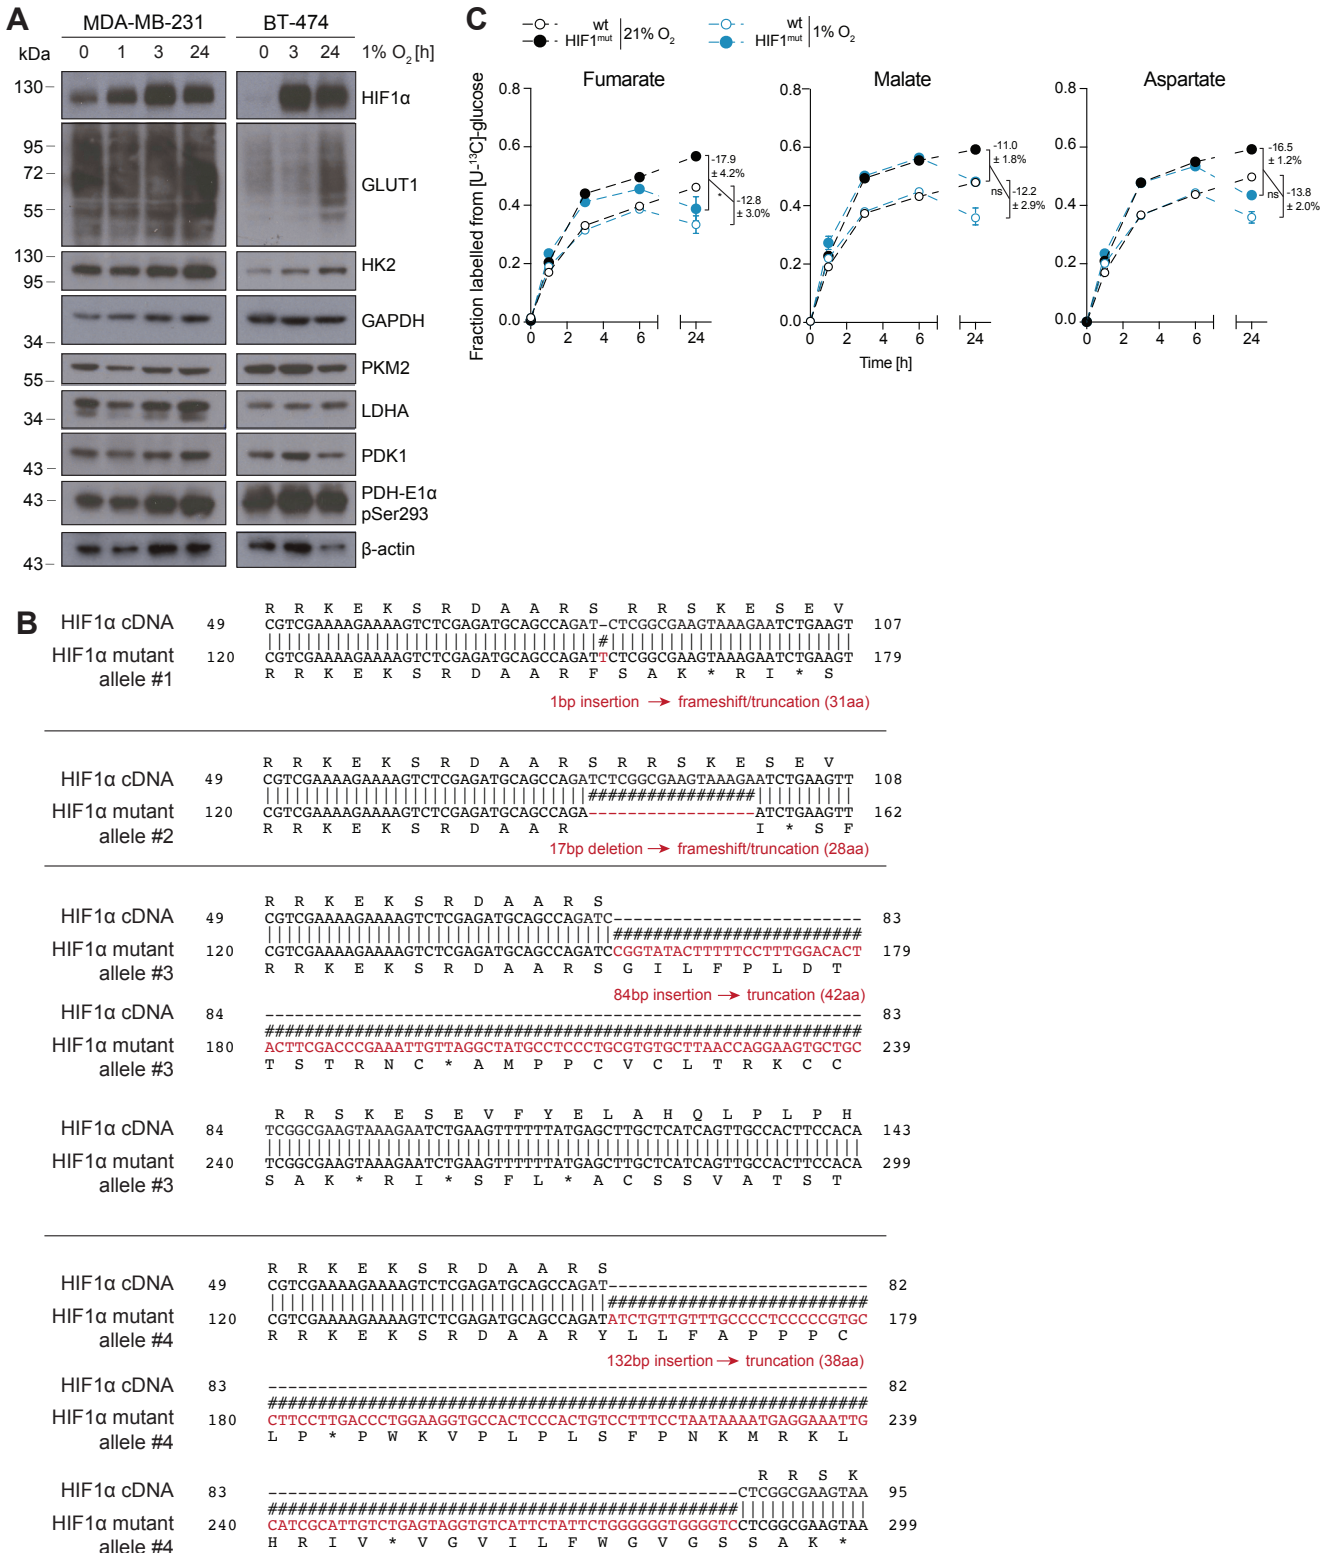

**Appendix Figure S2 related to Figure 2. HIF1α target expression in breast cancer cell lines and metabolic response to hypoxia in HIF1α<sup>mut</sup> MCF7 cells.**

**A)** Western blot to assess levels of HIF1α and a panel of HIF1α targets in the indicated cell lines incubated in 21% O<sub>2</sub> or at 1% O<sub>2</sub> for the indicated lengths of time. See also **Figure 2A**.

**B)** Sequence alignment of mutant HIF1α alleles in HIF1α<sup>mut</sup> MCF7 cells with exon 2 of human HIF1α cDNA (CCDS9753.1).

**C)** Fraction of the indicated metabolite pools labelled from [U-<sup>13</sup>C]-glucose in wild-type (wt) and HIF1α<sup>mut</sup> MCF7 cells as in **Figure 2D**. See also **Figure 2D**.

Data information: Datapoints in C represent mean ± s.d. and statistical errors were propagated to calculate variance of the change in isotopic labelling between normoxia and hypoxia for each cell line. n = 4 cultures for each time point and condition. The P values shown were calculated by two-way ANOVA Sidak's test. ns: non-significant, \* P<0.05, \*\* P<0.01, \*\*\* P<0.001, \*\*\*\* P<0.0001.

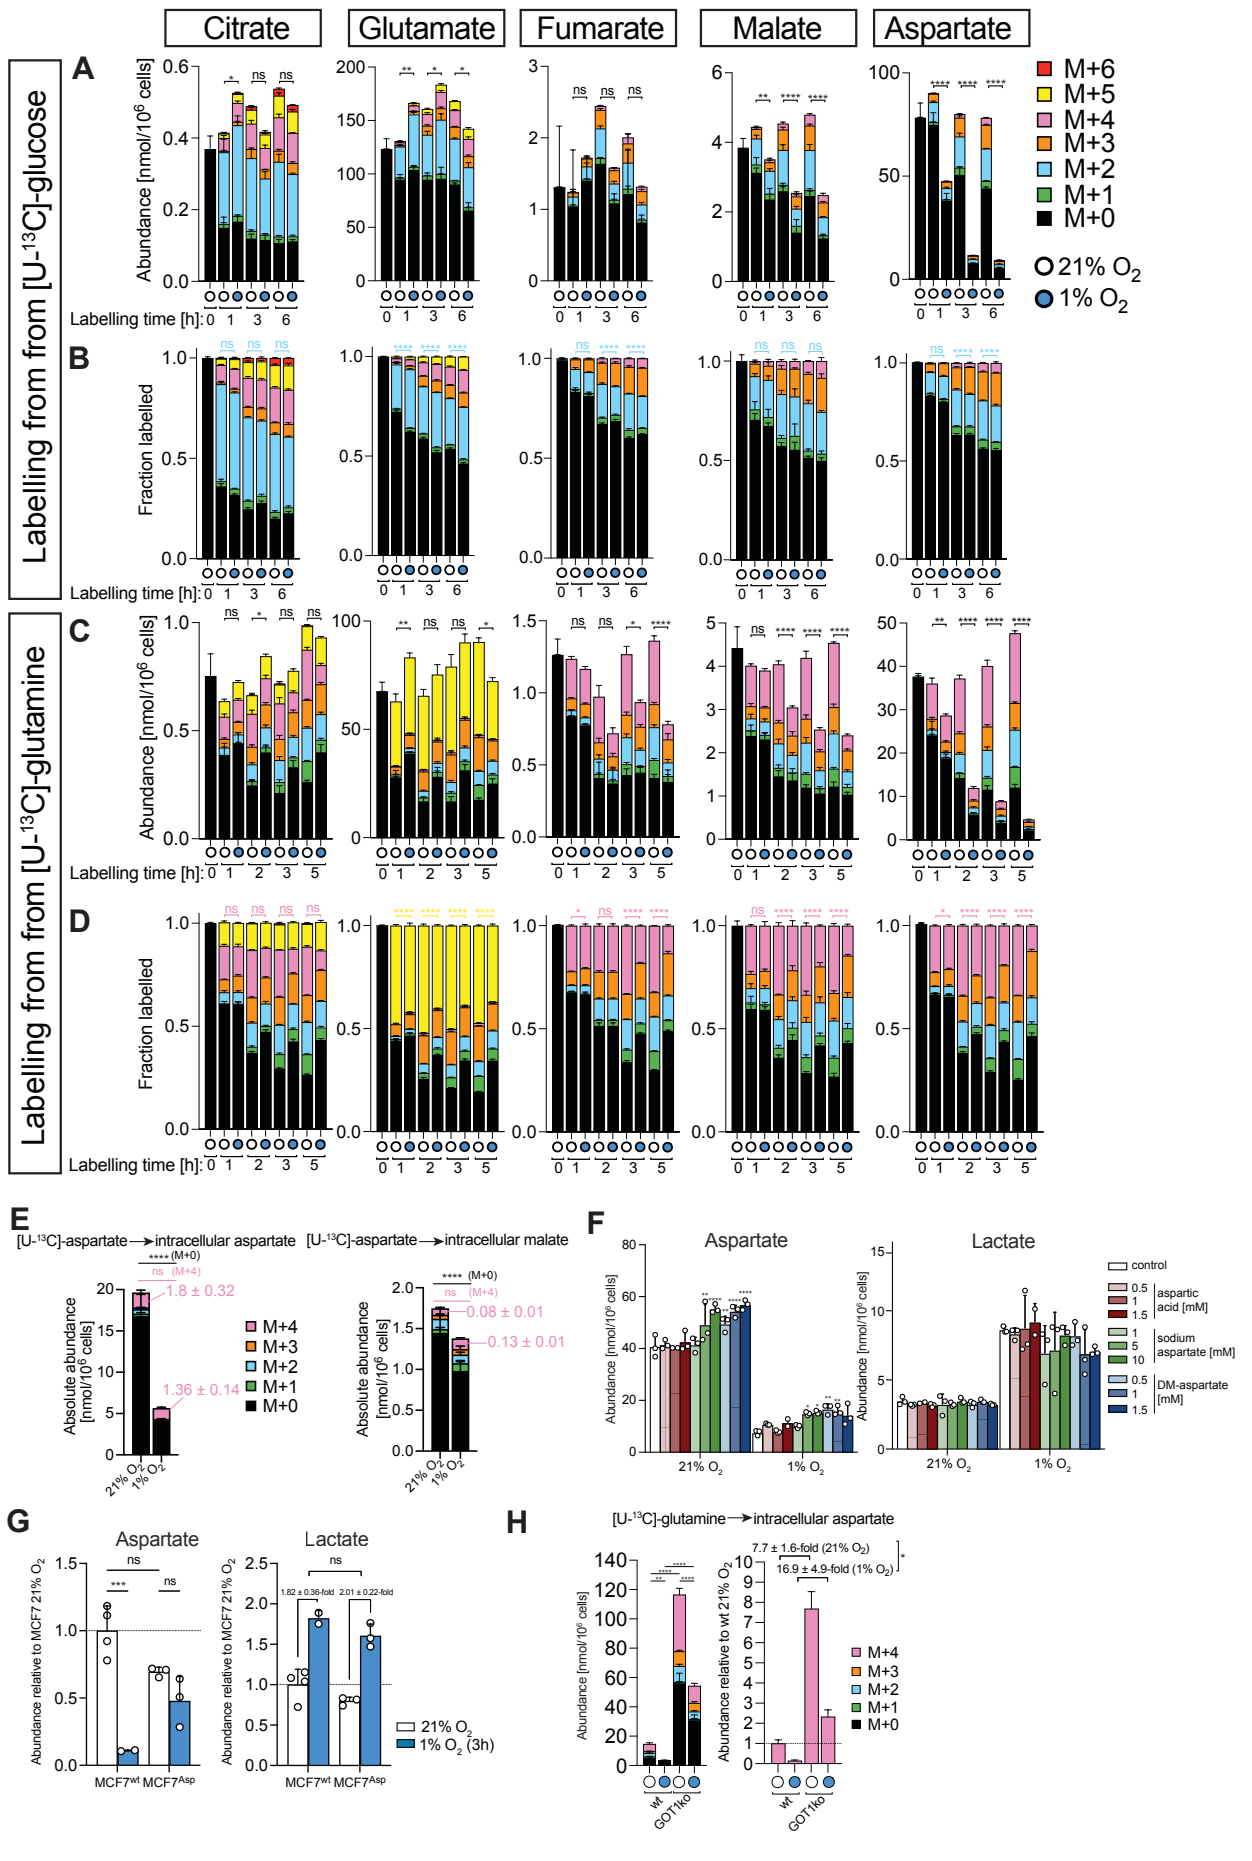

Appendix Figure 3 - Figure legend on the next page

**Appendix Figure S3 related to Figure 3. Evidence for decreased aspartate synthesis from both glucose and glutamine, and fate of exogenous aspartate in early hypoxia.**

**A-B)** Absolute (A) and fractional (B) isotopologue abundances of the indicated metabolites after incubation of MCF7 cells with [U-<sup>13</sup>C]-glucose in 21% O<sub>2</sub> or 1% O<sub>2</sub> for the lengths of time shown. Data are from the same experiment as in **Figure 2D** and **S2C**, shown here for comparison with glutamine labeling in panel **C** below.

**C-D)** As in **A** and **B**, respectively, but using [U-<sup>13</sup>C]-glutamine.

**E)** Absolute isotopologue abundance distribution of intracellular aspartate (left) and malate (right) in MCF7 cells incubated with 1.5mM [U-<sup>13</sup>C]-aspartate.

**F)** Intracellular abundances of aspartate and lactate in MCF7 cells in 21% O<sub>2</sub> and after 3 h in 1% O<sub>2</sub>. Media were supplemented with the indicated concentrations of aspartic acid, sodium aspartate or cell-permeable dimethyl-aspartate (DM-aspartate) for 3 h.

**G)** Intracellular aspartate and lactate abundances in MCF7 cells, or cells that had been chronically cultured in 0.5mM aspartate (MCF7<sup>Asp</sup>), incubated in 21% O<sub>2</sub> or 1% O<sub>2</sub> for 3 h in the presence of 0.5mM aspartate.

**H)** Aspartate isotopologue abundance distribution in wt or GOT1ko MCF7 cells incubated with [U-<sup>13</sup>C]-glutamine in 21% O<sub>2</sub> or 1% O<sub>2</sub> for 3h. The bar graph on the right shows only the M+4 isotopologue abundance relative to wt cells in 21% O<sub>2</sub>.

Data information: Datapoints in all graphs represent mean ± s.d. (incl. error propagation in H). n = 4 [A-D (except 1% O<sub>2</sub> 6h (n = 3), H)], n = 5 (E), n = 2-3 (F) cultures for each time point and condition. For panel G, n = 4, 2, 3, 3 (for MCF7<sup>wt</sup> 21% O<sub>2</sub>, MCF7<sup>wt</sup> 1% O<sub>2</sub>, MCF7<sup>Asp</sup> 21% O<sub>2</sub> and MCF7<sup>Asp</sup> 1% O<sub>2</sub>, respectively) cultures per time point and condition. P values shown were calculated by two-way ANOVA Sidak's test (A, C, E, G-aspartate), two-way ANOVA Tukey's test (B, D, H-left), two-way ANOVA Dunnett's test (F), or a two-tailed, unpaired t test (G-lactate, and H-right for significance of fold-change differences). For A-D, only the P values for the major isotopologues generated by each label are shown (for B: M+2 of all metabolites and for D: glutamate M+5; and citrate, fumarate, malate, aspartate M+4. ns: non-significant, \* P<0.05, \*\* P<0.01, \*\*\* P<0.001, \*\*\*\* P<0.0001.

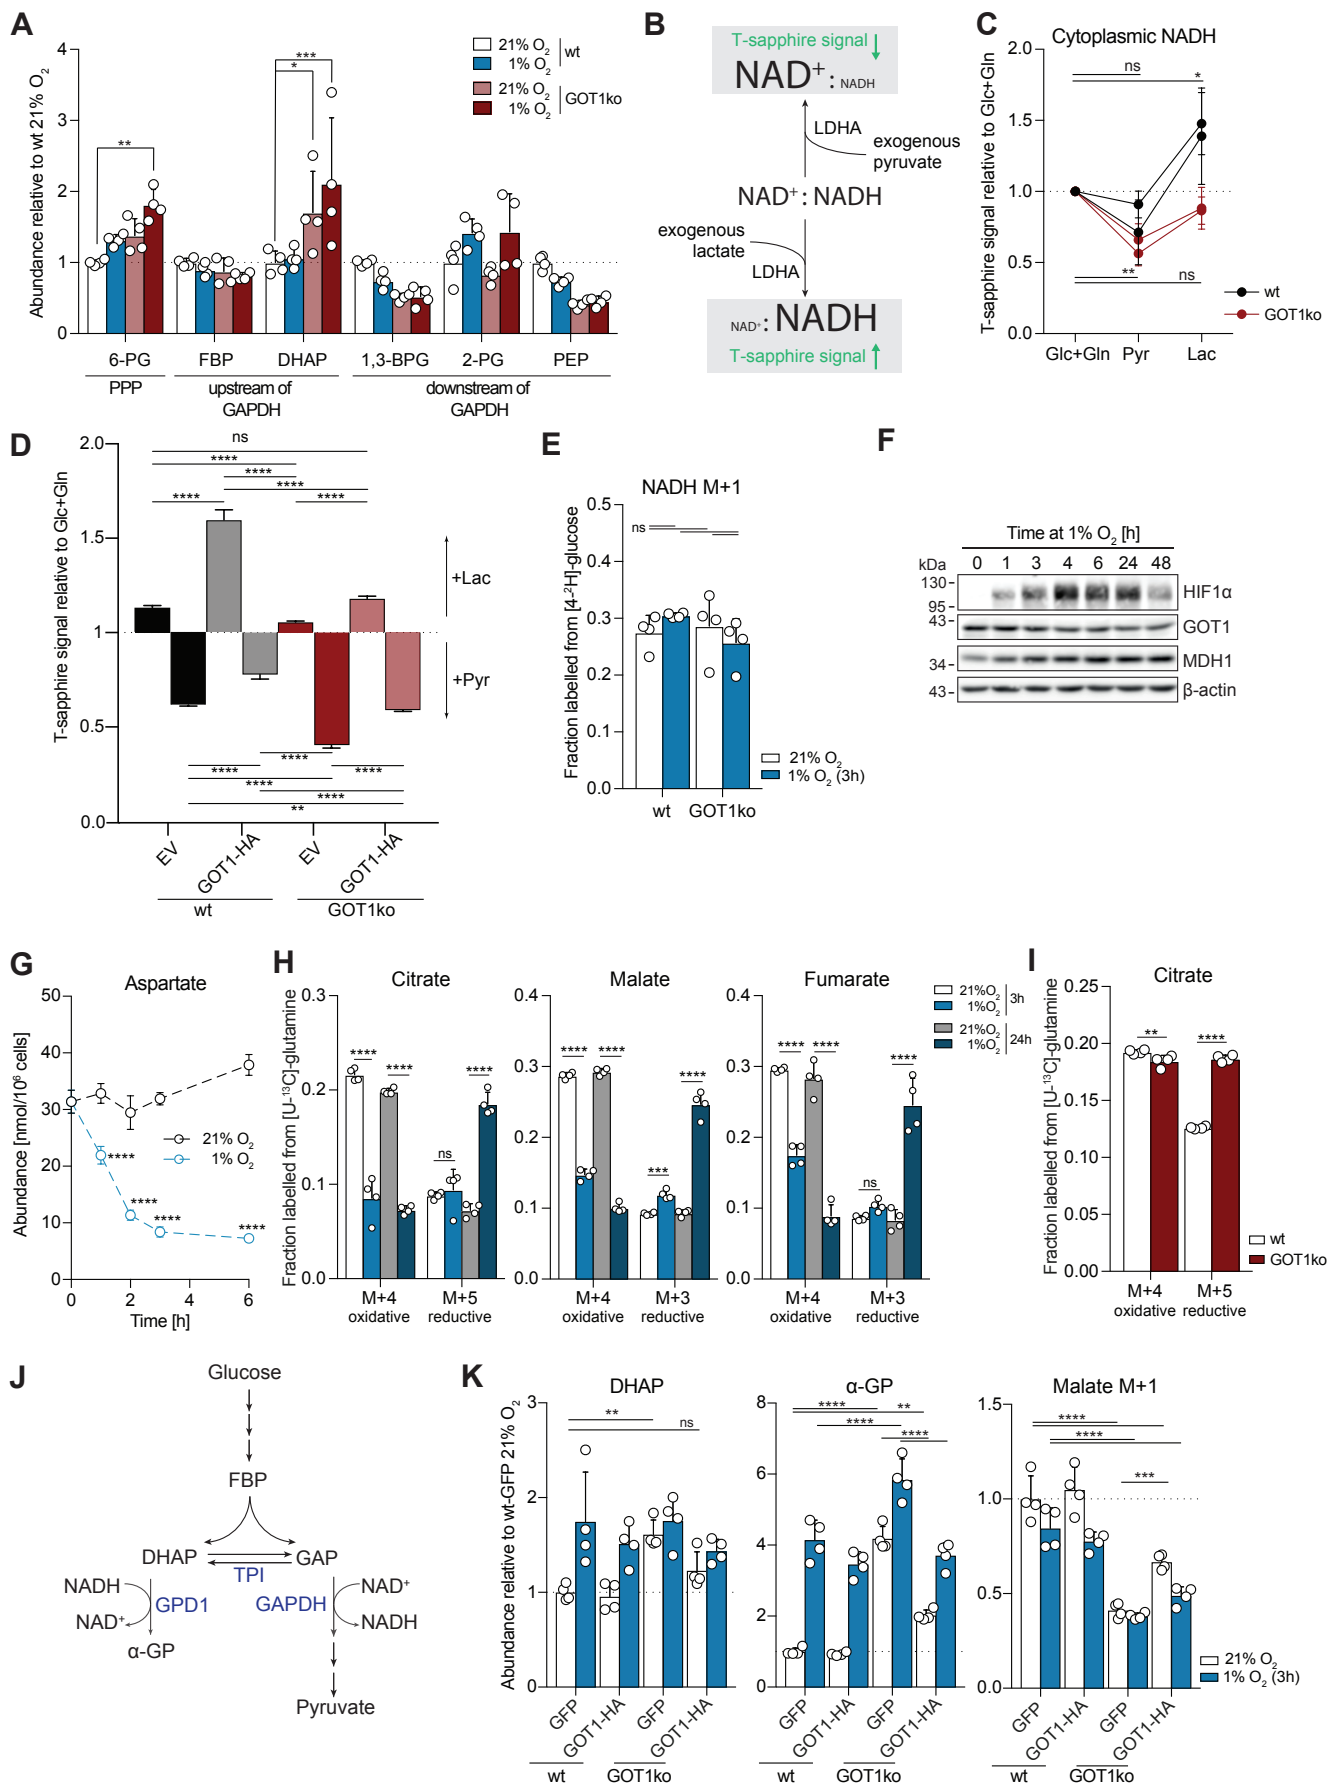

Appendix Figure 4 - Figure legend on the next page

**Appendix Figure S4 related to Figure 4. Aspartate metabolism, and reductive carboxylation in early hypoxia.**

**A)** Bar graph representation of the data in **Figure 4A**.

**B)** Schematic illustrating the effect of exogenous lactate and pyruvate on the cytoplasmic NAD<sup>+</sup>/NADH ratio and Peredox T-sapphire fluorescence intensity.

**C)** Peredox T-sapphire fluorescence signal intensity in wild-type (wt) and GOT1ko MCF7 cells in buffer containing 5.5 mM glucose and 2 mM glutamine (Glc+Gln) and after sequential incubation first with 10 mM pyruvate (Pyr) and then with 10 mM lactate (Lac) (reverse order of that used in **Figure 4E**). Signal was normalized per nucleus and is shown relative to the Glc+Gln condition. See also **Figure 4E**.

**D)** Peredox T-sapphire fluorescence signal intensity in wild-type (wt) and GOT1ko MCF7 cells stably expressing an empty vector (EV) or HA-tagged GOT1. Cells in buffer containing 5.5 mM glucose and 2 mM glutamine (Glc+Gln) were sequentially incubated first with 10 mM lactate (Lac) and then with 10 mM pyruvate (Pyr). Signal was normalized per nucleus and is shown relative to the Glc+Gln condition.

**E)** Fraction of NADH labelled from [4-<sup>2</sup>H]-glucose in the experiment shown in **Figure 4G**.

**F)** Western blot to assess levels of GOT1 and MDH1 in wild-type (wt) and GOT1ko cells incubated in 1% O<sub>2</sub> for the indicated lengths of time.

**G)** Intracellular abundance of aspartate in the experiment shown in **Figure 4H-J**.

**H)** Fractions of citrate, malate and fumarate labelled from [U-<sup>13</sup>C]-glutamine after incubation with the tracer in 21% O<sub>2</sub> or 1% O<sub>2</sub> for 3 or 24 h. Isotopologues produced via oxidative TCA (citrate M+4, malate M+4, fumarate M+4) and via reductive carboxylation (citrate M+5, malate M+3, fumarate M+3) are shown.

**I)** Fraction of citrate labelled from [U-<sup>13</sup>C]-glutamine after incubation of wild-type (wt) and GOT1ko MCF7 cells with the tracer for 3 h.

**J)** Schematic illustrating the fate of glucose carbons on either side of the triosephosphate isomerase (TPI) reaction.

**K)** Intracellular abundance of dihydroxyacetone phosphate (DHAP), α-glycerophosphate (α-GP) and malate M+1 (labelled from [4-<sup>2</sup>H]-glucose after incubation with the tracer for 3 h) in wild-type (wt) and GOT1ko MCF7 cells stably expressing GOT1-HA or GFP after 3 h at 21% O<sub>2</sub> or 1% O<sub>2</sub>.

Data information: Datapoints represent mean ± s.d. (A, C, E, G-I and K) or ± s.e.m. (D). n = 4 cultures for each time point/cell line/condition (A, C-E, G-I, K) except for G, 1% O<sub>2</sub>, 2 h (n = 3) and 21% O<sub>2</sub>, 3 h (n = 2). Data points in C represent mean ± SD of 2 independent replicates per cell line (n = 17-56 cells per replicate). Data points in D (n = 64-654 cells per cell line) are representative of 3 independent experiments. P values shown were calculated by two-way ANOVA Dunnett's test (C), two-way ANOVA Sidak's test [A, E, G-I, K (DHAP)], two-way ANOVA Tukey's test [K (α-GP, Malate M+1)], or Kruskal-Wallis test (D). ns: non-significant, \* P<0.05, \*\* P<0.01, \*\*\* P<0.001, \*\*\*\* P<0.0001.

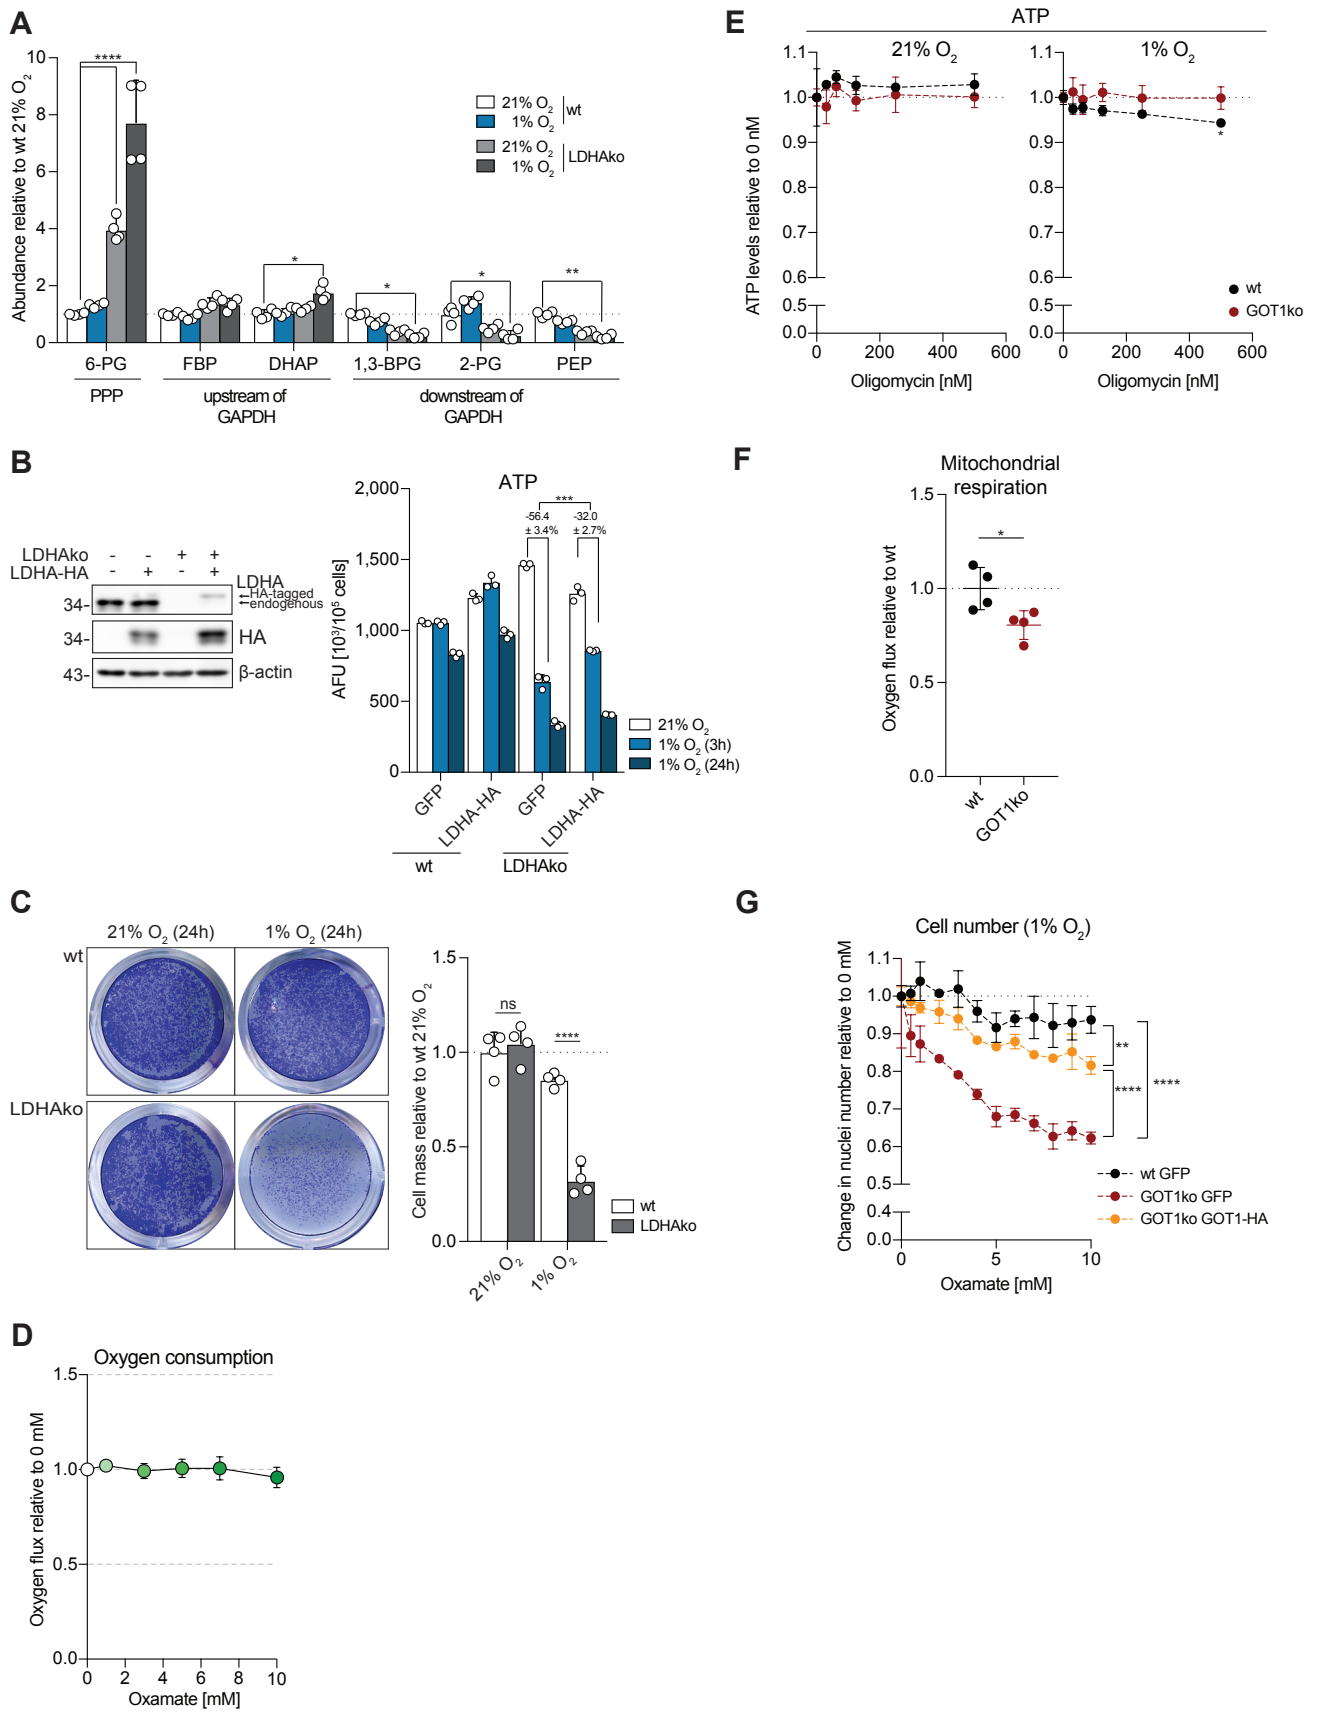

Appendix Figure 5 - Figure legend on the next page



**Appendix Figure S5 related to Figure 5. Effects of LDHA knock-out on metabolism and cell mass accumulation.**

**A)** Bar graph representation of the data in **Figure 5C**.

**B)** Left side: Western blot to assess the levels of endogenous LDHA and HA-tagged LDHA in wild-type and LDHAko MCF7 cells stably expressing LDHA-HA or GFP. Right side: ATP levels in the same cell lines at 21% O<sub>2</sub> and after 3 h or 24 h in 1% O<sub>2</sub>. See also **Figure 5E**.

**C)** Cell mass accumulation in wild-type (wt) and LDHAko MCF7 cells assessed by crystal violet staining after 24 h at 21% O<sub>2</sub> or 1% O<sub>2</sub>. Left side shows images of representative wells (with fixed and stained cells) from under each condition; right side shows quantification of crystal violet staining.

**D)** Cellular oxygen consumption in MCF7 cells treated successively with increasing oxamate concentrations.

**E)** ATP levels in wild-type (wt) and GOT1ko MCF7 cells at 21% O<sub>2</sub> and after 3 h in 1% O<sub>2</sub> treated with the indicated oligomycin concentrations for 3 h.

**F)** Mitochondrial respiration of wild-type (wt) and GOT1ko MCF7 cells. Cellular oxygen consumption was corrected for ROX (residual oxygen consumption) by addition of the complex III inhibitor antimycin A.

**G)** Change in cell confluence of wild-type (wt) and GOT1ko MCF7 cells stably expressing GOT1-HA or GFP within 24 hours at 1% O<sub>2</sub> with the indicated oxamate concentration in cell culture media, shown relative to 0 mM oxamate per cell line. Significance only shown for 10 mM [oxamate].

Data information: Datapoints in all panels represent mean  $\pm$  s.d. n = 4 (A, F), n = 3 (C, E) cultures for each cell line and condition, or n = 3 (B) assays per cell line and condition. For D, graphs show combined replicate measurements from 2-3 independent experiments per condition. P values shown were calculated by two-way ANOVA Sidak's test (A), two-way ANOVA Tukey's test (C, G), one-way ANOVA Dunnett's test (D), two-way ANOVA Dunnett's test (E), or unpaired, two-tailed t-test (F). Statistical errors in B were propagated to calculate the error of the change in lactate between normoxia and hypoxia for each condition and significance between these changes was then tested using unpaired, two-tailed t-test. ns: non-significant, \* P<0.05, \*\* P<0.01, \*\*\* P<0.001, \*\*\*\* P<0.0001.

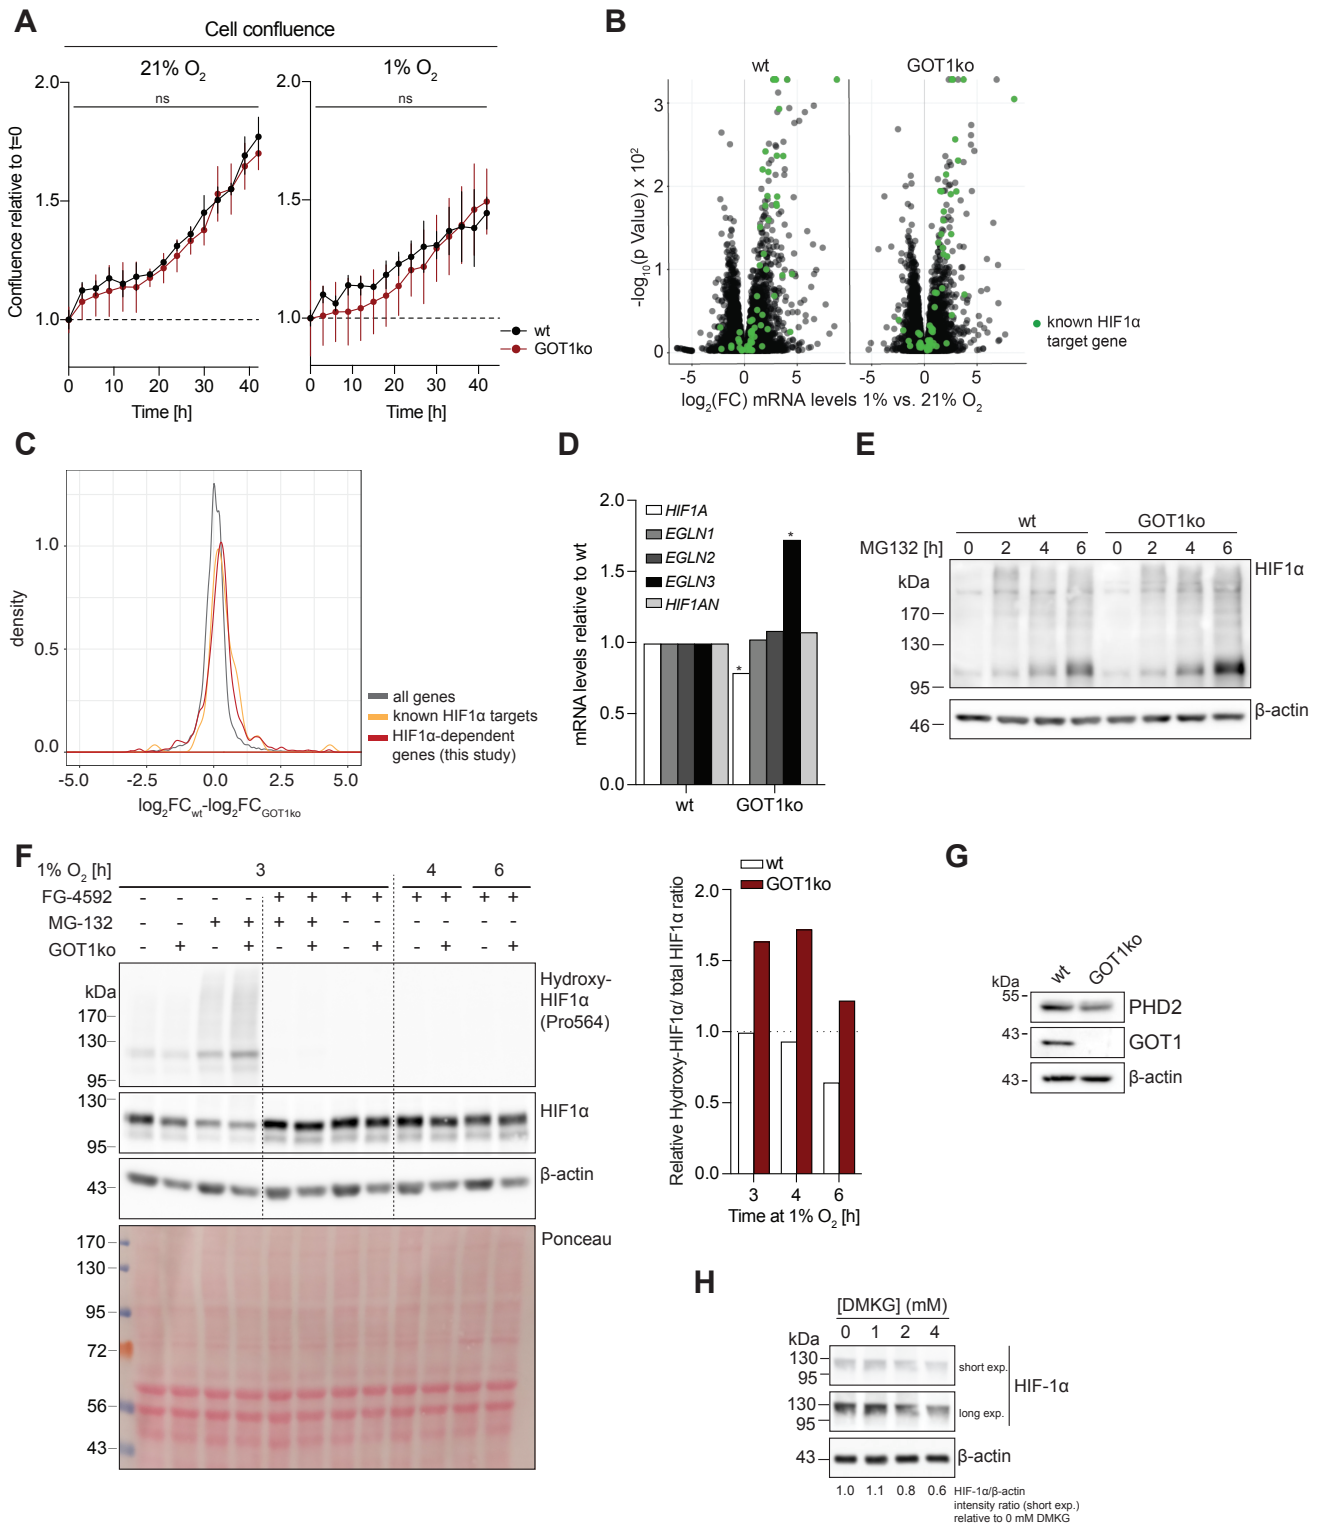

Appendix Figure 6 - Figure legend on the next page

**Appendix Figure S6 related to Figure 6. HIF1 $\alpha$  hydroxylation, stability and target gene expression in GOT1ko cells.**

**A)** Cell confluence of wild-type (wt) and GOT1ko MCF7 cells at 21% O<sub>2</sub> or 1% O<sub>2</sub>, shown relative to t=0 h. Time points also indicate duration of hypoxia treatment.

**B)** Volcano plot of gene expression changes in wild-type (wt) MCF7 and GOT1ko cells exposed to 1% O<sub>2</sub> for 24 h, compared to control cells in normoxia. HIF1 $\alpha$  target genes shown in green.

**C)** Histogram showing frequency density of the difference in log<sub>2</sub>-fold mRNA expression changes after 24 h in 1% O<sub>2</sub> between wild-type (wt) and GOT1ko MCF7. The graph shows the distribution of all genes, known HIF1 $\alpha$  target genes and experimentally determined HIF1 $\alpha$ -dependent genes from this study (See **Dataset EV1**). HIF1 $\alpha$ -dependent genes are defined as protein-coding genes (excluding long non-coding RNAs, antisense RNAs and miRNAs), the expression of which changed more than 2-fold in wild-type MCF7 cells after 24 h at 1% O<sub>2</sub> but less than 2-fold in HIF1 $\alpha$ <sup>mut</sup> MCF7 cells.

**D)** Fold-change of expression of the indicated genes in GOT1ko cells relative to wild-type (wt) MCF7 cells from (B). *EGLN1*, *EGLN2*, *EGLN3* and *HIF1AN* encode PHD2, PHD1, PHD3 and factor inhibiting HIF (FIH), respectively.

**E)** Western blot to assess the levels of HIF1 $\alpha$  in wild-type (wt) and GOT1ko MCF7 cells treated with the proteasome inhibitor MG-132 (10  $\mu$ M) for the indicated lengths of time.

**F)** Western blot to assess the levels of HIF1 $\alpha$  and hydroxylated HIF1 $\alpha$  (Pro564) in wild-type (wt) and GOT1ko MCF7 cells exposed to 1% O<sub>2</sub> for the indicated lengths of time. Cells were treated with the PHD inhibitor FG-4592 (50  $\mu$ M), the proteasome inhibitor MG-132 (10  $\mu$ M) or a combination of both for the duration of the experiment. Right side shows quantification of lanes corresponding to MG-132-only treated samples from western blots in **Figure 6E** and **S6F**, presented as the ratio of hydroxylated HIF1 $\alpha$  to total HIF1 $\alpha$ . See also **Figure 6E**.

**G)** Western blot to assess the levels of PHD2 in wild-type (wt) and GOT1ko MCF7 cells.

**H)** Western blot to assess the levels of HIF1 $\alpha$  in wild-type MCF7 cells incubated at 1% O<sub>2</sub> in media containing the indicated doses of the cell-permeable  $\alpha$ KG analogue DMKG.

Data information: Datapoints in A represent mean  $\pm$  s.d. n = 3 cultures for each cell line and condition (A, B). FDRs in B and derivative graph D were calculated using the 'exactTest' function of the edgeR package (see Materials and Methods) with a cut-off set at 1%; only changes with FDR<0.01 are shown. Significance in A was calculated by two-way ANOVA Sidak's test (ns: not significant). Asterisks in D indicate genes with FDR<0.01.

**Appendix Table S1.** Table of fragment ions used for metabolite quantification by GC-MS.

| Metabolite                                 | KEGG ID | m/z | Chemical Formula  | Notes                                         |
|--------------------------------------------|---------|-----|-------------------|-----------------------------------------------|
| 3-Phosphoglycerate (3PG)                   | C00197  | 459 |                   |                                               |
| Alanine                                    | C00041  | 116 |                   |                                               |
| Aspartate                                  | C00049  | 334 | C12 O4 N1 H28 Si3 |                                               |
| Citrate                                    | C00158  | 375 | C15 O5 H31 Si3    |                                               |
| Cysteine                                   | C00097  | 220 |                   |                                               |
| Fumarate                                   | C00122  | 245 | C9 O4 H17 Si2     |                                               |
| Glutamate                                  | C00025  | 348 | C13 O4 N1 H30 Si3 |                                               |
| $\alpha$ -Glycerophosphate ( $\alpha$ -GP) | C03189  | 445 | C14 O6 H38 Si4    |                                               |
| Glycine                                    | C00037  | 174 |                   |                                               |
| Isoleucine                                 | C00407  | 158 |                   |                                               |
| Lactate                                    | C00186  | 117 | C5 O1 H13 Si1     |                                               |
| Leucine                                    | C00123  | 158 |                   |                                               |
| Lysine                                     | C00047  | 217 |                   |                                               |
| Malate                                     | C00149  | 245 | C10 O3 H21 Si2    | Used in <sup>2</sup> H-labelling experiments  |
| Malate                                     | C00149  | 335 | C12 O5 H27 Si3    | Used in <sup>13</sup> C-labelling experiments |
| Methionine                                 | C00073  | 176 |                   |                                               |
| <i>myo</i> -Inositol                       | C00137  | 318 |                   |                                               |
| Ornithine                                  | C00077  | 174 |                   |                                               |
| Phenylalanine                              | C00079  | 218 |                   |                                               |
| Proline                                    | C00148  | 142 |                   |                                               |
| Putrescine                                 | C00134  | 174 |                   |                                               |
| Pyruvate                                   | C00022  | 174 | C6 O3 N1 H12 Si1  |                                               |
| <i>scyllo</i> -Inositol, internal standard | C06153  | 318 |                   |                                               |
| Serine                                     | C00065  | 204 |                   |                                               |
| Succinate                                  | C00042  | 247 | C9 O4 H19 Si2     |                                               |
| Threonine                                  | C00188  | 320 |                   |                                               |
| Tryptophan                                 | C00078  | 218 |                   |                                               |
| Tyrosine                                   | C00082  | 218 |                   |                                               |
| Uracil                                     | C00106  | 241 |                   |                                               |
| Valine                                     | C00183  | 144 |                   |                                               |

**Appendix Table S2.** Table of fragment ions used for metabolite quantification by LC-MS.

| Metabolite                 | KEGG ID | Polarity | m/z      | Fragments | Chemical Formula |
|----------------------------|---------|----------|----------|-----------|------------------|
| 6-Phosphogluconate         | C00345  | -        | 275.0173 | 96.969    | C6 O10 H13 P1    |
|                            |         |          |          | 78.959    |                  |
| Fructose 1,6-bisphosphate  | C00354  | +        | 341.0033 | 96.970    | C6 O12 H14 P2    |
|                            |         |          |          | 78.959    |                  |
| Dihydroxyacetone phosphate | C00111  | -        | 168.9908 | 96.970    | C3 O6 H7 P1      |
|                            |         |          |          | 78.959    |                  |
| 1,3-Bisphosphoglycerate    | C00236  | -        | 264.9520 | 116.975   | C3 O10 H8 P2     |
|                            |         |          |          | 78.959    |                  |
| 2-Phosphoglycerate         | C00631  | -        | 184.9857 | 78.958    | C3 O7 H7 P1      |
|                            |         |          |          | 96.969    |                  |
|                            |         |          |          | 166.975   |                  |
| Phosphoenolpyruvate        | C00074  | -        | 166.9751 | 78.958    | C3 O6 H5 P1      |
